# Supplementary material for: Melatonin Pretreatment Protects Against Status Epilepticus, Glutamate Transport, and Oxidative Stress Induced by Kainic Acid in Zebrafish
Source: Research Square preprint supplement (doi:10.21203/rs.3.rs-611477/v1), 2021-06-17
Supplement: Supplementary file 1 [file 52a177e89ee2656bad7af52d.pdf]

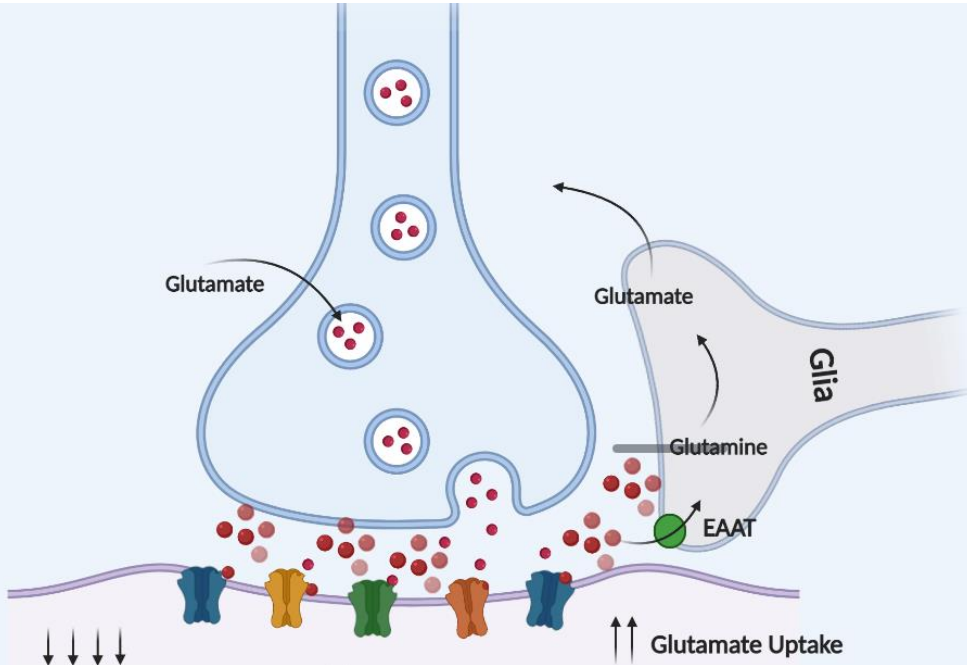

↓ ↓ ↓ ↓ ↓  
Oxidative Stress  
Apoptosis

↓ ↓ EROS

*KA seizure without Melatonin pretreatment*

*Melatonin pretreatment on KA-induced seizures*

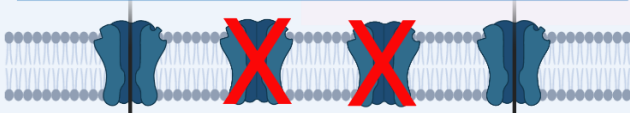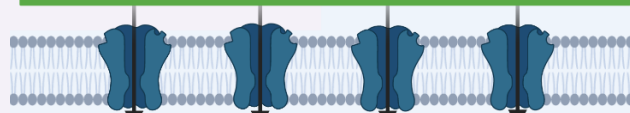

Glu Na<sup>+</sup>      Glu Na<sup>+</sup>

Glu Na<sup>+</sup>      Glu Na<sup>+</sup>      Glu Na<sup>+</sup>      Glu Na<sup>+</sup>

↓  
Glutamate uptake

↑  
Glutamate uptake

↑  
DCFH

↑  
TBARS

↓  
DCFH

↓  
TBARS

↓  
SOD/CAT

↓  
GPx  
GS

↑  
SOD/CAT

↑  
GPx  
GS
